# Supplementary material for: Functionalized graphitic carbon nitride as an efficient electro-analytical platform for the label-free electrochemical sensing of interleukin-8 in saliva samples
Source: Royal Society of Chemistry journal article supplement (doi:10.1039/d4nr02039a), 2024-07-11
Supplement: d4nr02039a1.pdf [file d4nr02039a1.pdf]

# **Functionalized Graphitic Carbon Nitride as an Efficient Electro-Analytical Platform for the Label-free Electrochemical Sensing of Interleukin-8 in Saliva Samples**

Sumit K. Yadav<sup>1,2§</sup>, Amit K. Yadav<sup>1§</sup>, Ajeet Kaushik<sup>3</sup>, Pratima R. Solanki<sup>1\*</sup>

<sup>1</sup>NanoBio Laboratory, Special Center for Nanoscience, Jawaharlal Nehru University, New Delhi-110067, INDIA

<sup>2</sup>University Department of Biotechnology, Vinoba Bhave University, Hazaribagh, Jharkhand 825301, INDIA

<sup>3</sup>NanoBioTech Laboratory, Department of Environmental Engineering, Florida Polytechnic University, Lakeland 33805, FL, USA

§ Authors Contributed Equally to this work.

\*Corresponding Author

Dr. Pratima R. Solanki

Nano-Bio Laboratory, Special Center for Nanoscience,

Jawaharlal Nehru University, New Mehrauli Road,

JNU Ring Rd, New Delhi, 110067, India

Tel: + 011-26704740 / 26704699

Email: [partima@mail.jnu.ac.in](mailto:partima@mail.jnu.ac.in); [pratimarsolanki@gmail.com](mailto:pratimarsolanki@gmail.com)

## SUPPLEMENTARY INFORMATION

### S1: Amino Acid Sequence of IL8 Protein

**AKELRCQCIKTYSKPFHPKFIKELRVIESGPHCANTEIIVKLSDGREL  
CLDPKENWVQRVVEKFLKRAENS**

### S2: FT-IR spectra of modified electrodes at each step

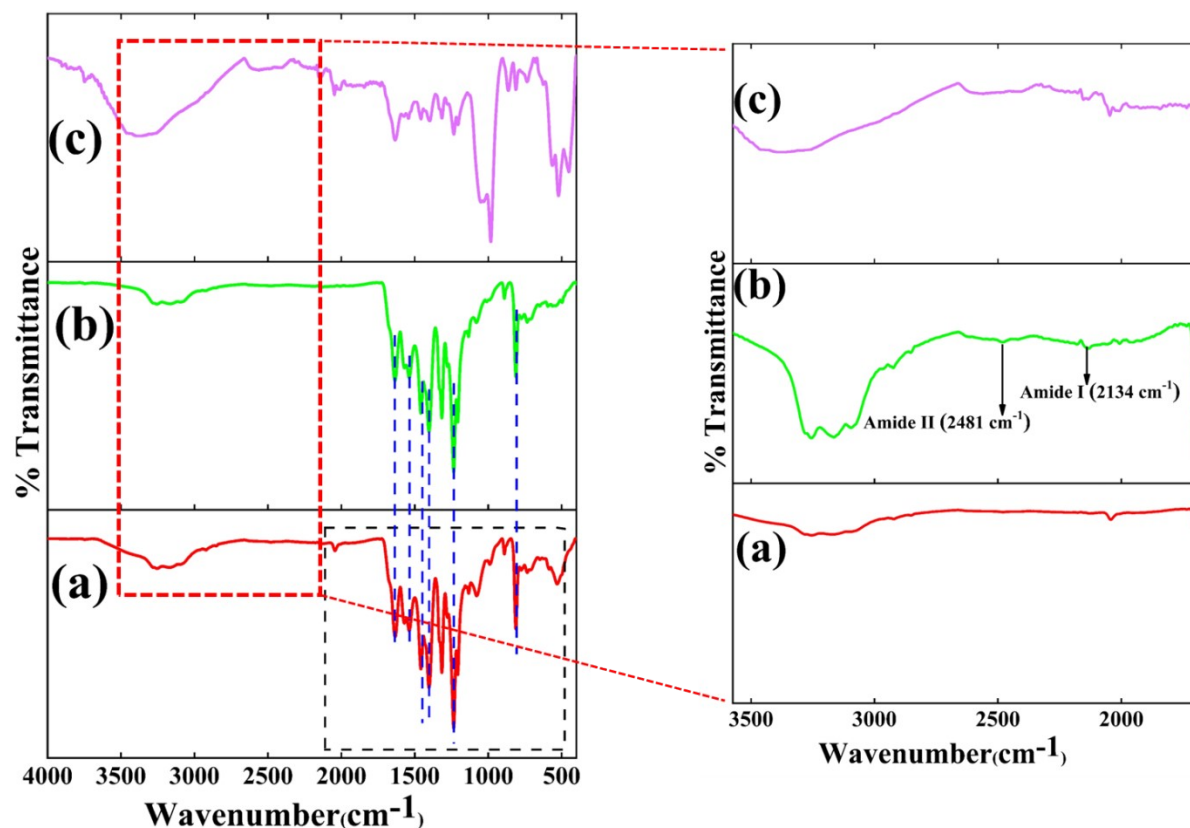

**Figure S1:** FT-IR spectra of different electrodes modified with anti-IL8 antibodies and BSA molecules (a) APTES@g-C<sub>3</sub>N<sub>4</sub>/ITO; (b) anti-IL8/APTES@g-C<sub>3</sub>N<sub>4</sub>/ITO; and (c) BSA/anti-IL8/APTES@g-C<sub>3</sub>N<sub>4</sub>/ITO.

### S3: Optimization studies

#### *(i) Exploration of Optimal Parameters for Electrophoretic Deposition: Voltage and Duration*

The electrophoretic deposition (EPD) process involved coating an ITO substrate with a thin film of the APTES@g-C<sub>3</sub>N<sub>4</sub>. To prepare the solution, APTES@g-C<sub>3</sub>N<sub>4</sub> (1 mg mL<sup>-1</sup>) was ultrasonicated in DI water for 3 hours. Hydrolyzed ITO was selected as the substrate for the deposition. The EPD was conducted using a two-electrode system. The colloidal solution, containing 4 mL acetonitrile, 200 μL APTES@g-C<sub>3</sub>N<sub>4</sub> solution (1 mg mL<sup>-1</sup>), and 20 μL

magnesium nitrate solution (0.5 M) as a supporting electrolyte, was employed in the cell. The ITO served as the cathode (working electrode), while a platinum wire acted as the anode. These electrodes were positioned opposite each other with a 1 cm gap. A uniform film of the APTES@g-C<sub>3</sub>N<sub>4</sub> on the ITO substrate was achieved under optimized conditions, specifically at 60 V for a duration of 120 seconds. Details of the optimization study can be found in Table S1.

**Table S1:** Optimization study of Voltage and time during electrophoretic deposition (EPD)

| S. No. | Voltage (V) | Time (min)  | Result                           |
|--------|-------------|-------------|----------------------------------|
| 1      | 30          | 1           | No deposition on ITO             |
| 2      | 40          | 2           | No deposition on ITO             |
| 3      | 50          | 1:30        | Non uniform deposition on ITO    |
| 4      | <b>60</b>   | <b>1:30</b> | <b>uniform deposition on ITO</b> |
| 5      | <b>60</b>   | <b>2</b>    | <b>uniform deposition on ITO</b> |
| 6      | 70          | 1:30        | Burning of ITO                   |
| 7      | 80          | 1           | Burning of ITO                   |

***ii) The concentration of anti-Sp17***

The concentration of anti-IL8 antibodies plays a crucial role in the successful fabrication of a high-performance biosensor by influencing its detection capability. In order to maximize the signal, the quantity of anti-IL8 antibody was fine-tuned. Six different concentrations of anti-IL8 antibodies ranging from 10 to 70  $\mu\text{g mL}^{-1}$  were experimented with, and the outcomes are presented in Fig. S4(c). The DPV method was employed to identify the optimum concentration of anti-IL8 antibodies bound to the APTES@g-C<sub>3</sub>N<sub>4</sub>/ITO electrode. The electrode's peak current exhibited an increasing trend with rising anti-IL8 antibody concentration within the range of 10-50  $\mu\text{g mL}^{-1}$ , reaching saturation at 50  $\mu\text{g mL}^{-1}$ , beyond which no further increase in current intensity was observed (Fig. S4(c)). Lower concentrations of anti-IL8 antibody (10-40  $\mu\text{g mL}^{-1}$ ) resulted in a diminished signal, and signals remained constant with increased concentrations of anti-IL8 antibody (50-70  $\mu\text{g mL}^{-1}$ ). Consequently, a dilution of 50  $\mu\text{g mL}^{-1}$  of anti-IL8 antibody was selected for subsequent immobilization onto the APTES@g-C<sub>3</sub>N<sub>4</sub>/ITO electrode.

***iii) Incubation time for anti-Sp17 antibodies***

An essential optimization factor is the incubation time of the bio-recognition element. This parameter holds significance as it directly impacts the binding efficiency of the antibody. The

APTES@g-C<sub>3</sub>N<sub>4</sub>-modified ITO electrode was subjected to incubation in a PBS solution containing antibodies with EDC: NHS for varying durations (1 h, 2 h, 3 h, 4 h, 5 h, 6 h, 7 h and 8 h). Incubation times ranging from 1 to 5 hours proved insufficient for antibody binding to the ITO electrode surface. Notably, the signals at 6 h to 8 h were nearly identical, displaying the highest current (Fig. S4(d)). Consequently, a 6-hour incubation time was selected as the optimal duration for binding the bio-recognition molecule to the sensing interface, chosen for its efficiency and time-saving attributes.

***iv) The Concentration of BSA***

The alterations in DPV peak current for the BSA/anti-IL8/APTES@g-C<sub>3</sub>N<sub>4</sub>/ITO immunoelectrode in response to varied BSA concentrations (ranging from 0.1% to 4%) are depicted in Fig. S4(e). An upward trend in peak current was noticed within the BSA concentrations of 0.1% to 2%, reaching saturation thereafter. Consequently, 2% emerged as the chosen and optimal BSA concentration for subsequent experiments.

***v) The effect of the redox couple i.e. {[Fe (CN)<sub>6</sub>]<sup>3-/4-</sup>}***

To observe the effect of the redox couple {[Fe (CN)<sub>6</sub>]<sup>3-/4-</sup>} on both electrodes i.e., APTES@g-C<sub>3</sub>N<sub>4</sub>/ITO and BSA/anti-IL8/APTES@g-C<sub>3</sub>N<sub>4</sub>/ITO immunoelectrode, CV technique was carried out in phosphate buffer saline (PBS) solution and then in PBS (0.2 M) containing 5 mM {[Fe (CN)<sub>6</sub>]<sup>3+/4+</sup>} as redox coupler, as shown in Fig. S4 (a) and (b). Fig. S4 indicates that PBS did not produce any strong oxidation or reduction peaks, whereas the addition of the redox couple resulted in prominent redox peaks for both electrodes, demonstrating that it increased the charge carrier/electron transfer. Therefore, PBS with 5 mM {[Fe (CN)<sub>6</sub>]<sup>3-/4-</sup>} as redox couple mediator was chosen as the optimal redox buffer for all the electrochemical experiments.

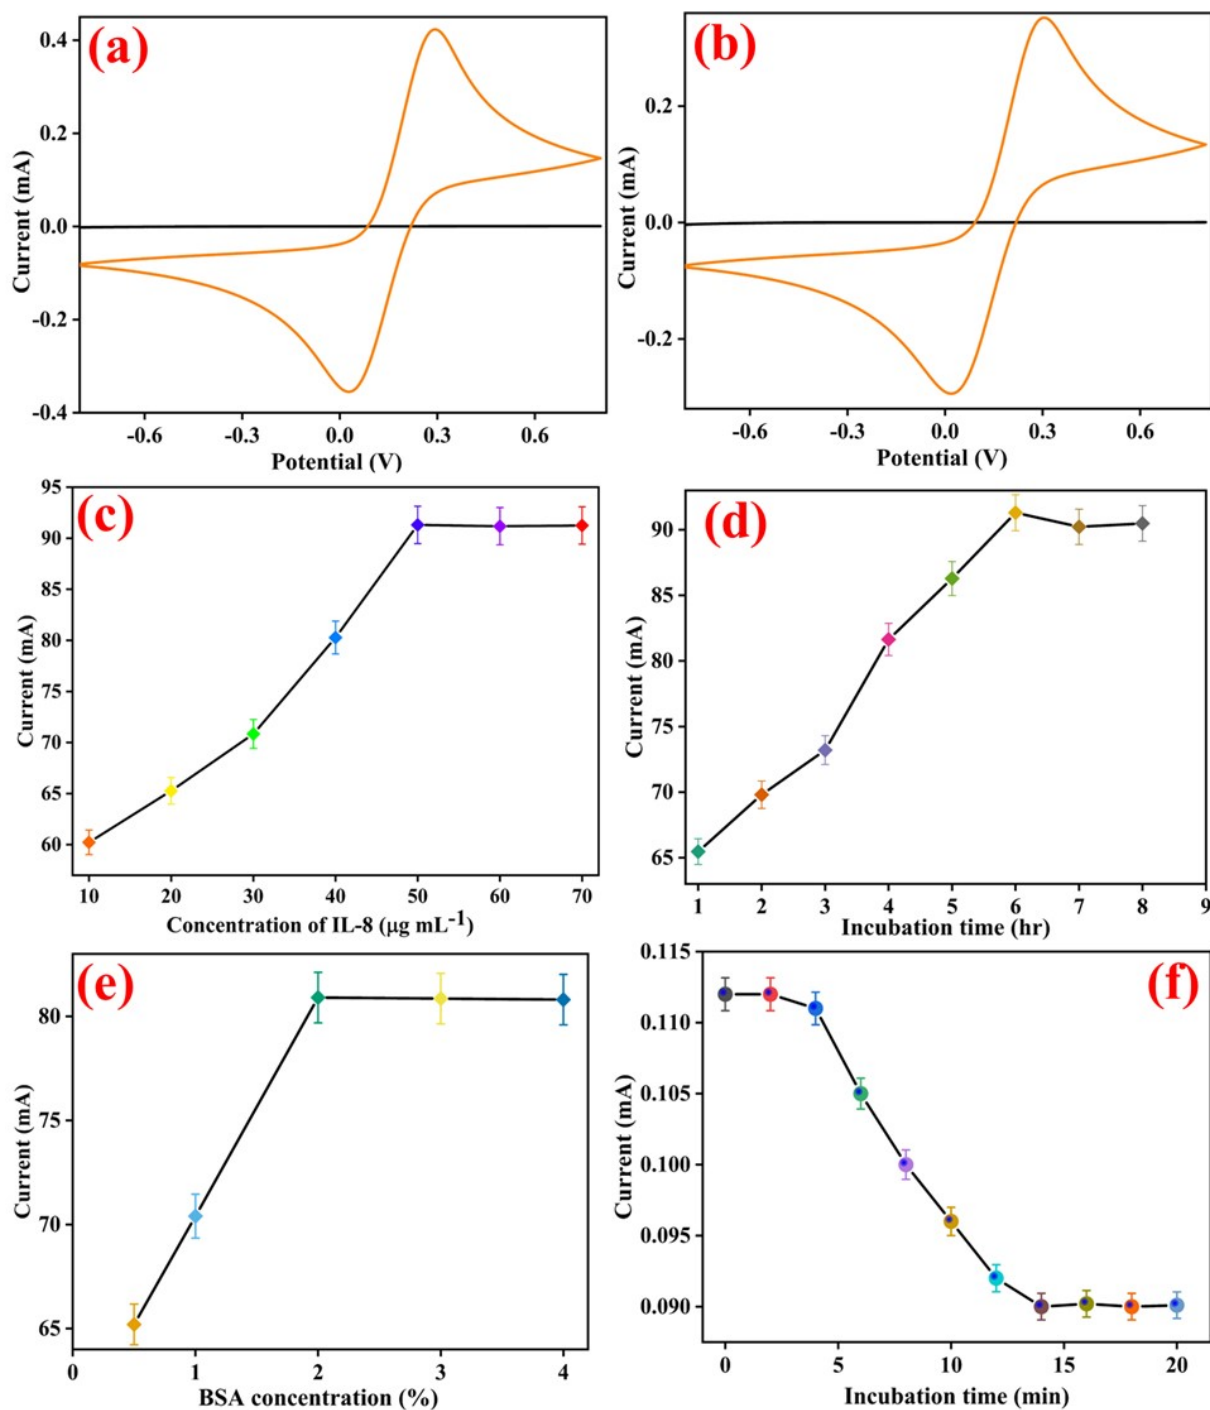

**Figure S2: Optimization studies.** Effect of redox species  $\{[\text{Fe}(\text{CN})_6]^{3+/4+}\}$  on (a) APTES@g-C<sub>3</sub>N<sub>4</sub>/ITO electrode, and (b) BSA/anti-IL8/APTES@g-C<sub>3</sub>N<sub>4</sub>/ITO immunoelectrode; effect of different concentrations of anti-IL8 antibodies (c); effect of different incubation time (e); effect of BSA concentration; and (f) response time study. The error bars are obtained via three independent experiments.

**Table S2: Optimized Parameters for Experimental Conditions**

| Variable                                                                                   | Tested                                                | Selected                 |
|--------------------------------------------------------------------------------------------|-------------------------------------------------------|--------------------------|
| <b>EPD parameter of APTES@g-C<sub>3</sub>N<sub>4</sub> deposition (voltage &amp; time)</b> | Voltage- 30, 40, 50, 60, & 70<br>Time- 60, 90 & 120 s | 60 V and 120s            |
| <b>anti-IL8 conc.</b>                                                                      | 10, 20, 30, 40, 50, 60, & 70<br>$\mu\text{g mL}^{-1}$ | 50 $\mu\text{g mL}^{-1}$ |
| <b>anti-IL8 incubation time</b>                                                            | 1, 2, 3, 4, 5, 6, 7 h, & 8 h                          | 6 h                      |
| <b>BSA concentration</b>                                                                   | 0.1, 0.2, 0.5, 1, 1.5, & 2 %                          | 2 %                      |
| <b>pH</b>                                                                                  | 6.0, 6.5, 7.0, 7.5, & 8.0                             | 7.0                      |
| <b>Response time</b>                                                                       | 2, 4, 6, 8, 10, 15, 20 & 25<br>min                    | 15 min                   |

**S4: Kinetic interface studies**

The kinetic interface properties of the BSA/anti-IL8/APTES/g-C<sub>3</sub>N<sub>4</sub>/ITO and APTES@g-C<sub>3</sub>N<sub>4</sub>/ITO electrodes were evaluated to investigate electron dynamics. Important parameters included the diffusion constant (D), surface concentration of redox species ( $\gamma^*$ ), effective surface area (Ae), and standard heterogeneous electron transfer rate constant (Ks).

**(i) Diffusion co-efficient (D): -**

At the interface between the immunoelectrode surface and the electrolyte, which included the redox couple  $[\text{Fe}(\text{CN})_6]^{3-/4-}$ , the diffusion co-efficient (D) was estimated using the Randles-Sevcik equation [8]:

$$I_p = (2.69 \times 10^5) C n^{3/2} D^{1/2} \nu^{1/2} A \dots \dots \dots \text{Eq. (S1)}$$

Here, the peak current of the electrodes is represented by  $I_p$  ( $I_{pa}$  or  $I_{pc}$ ), the number of electrons involved in the redox event is indicated by 'n' (in this case, 1), A is the active area of surface of immunoelectrode (0.25 cm<sup>2</sup>), D is the diffusion coefficient (cm<sup>2</sup>s<sup>-1</sup>), C is the electrolyte species concentration (5 mM), and  $\nu$  is the scan rate (50 mVs<sup>-1</sup>).

In comparison to the APTES@g-C<sub>3</sub>N<sub>4</sub>/ITO electrode (0.216 × 10<sup>-11</sup> cm<sup>2</sup> s<sup>-1</sup>), the higher value of D observed for the BSA/anti-IL8/APTES@g-C<sub>3</sub>N<sub>4</sub>/ITO bioelectrode (1.93 × 10<sup>-11</sup> cm<sup>2</sup>s<sup>-1</sup>)

suggests a faster electron transfer kinetics at the electrolyte/electrode interface, leading to an improved analytical efficiency of this biosensor. Therefore, the working electrode's surface area and the electro-active species concentration affect the diffusion coefficient.

**(ii) Effective electroactive surface area ( $A_e$ ): -**

To ascertain the effective and efficient electroactive surface area ( $A_e$ ) of the unmodified electrode APTES@g-C<sub>3</sub>N<sub>4</sub>/ITO and the bioelectrode modified with anti-IL8 and BSA (BSA/anti-IL8/APTES@g-C<sub>3</sub>N<sub>4</sub>/ITO), the computed value of D was integrated into the subsequent equation:

$$A_e = \frac{S}{(2.69 \times 10^5)n^3 CD^{1/2}} \dots\dots\dots$$

Eq. (S2)

It is found that the BSA/anti-IL8/APTES@g-C<sub>3</sub>N<sub>4</sub>/ITO bioelectrode has an electroactive area ( $A_e$ ) of 1.36 mm<sup>2</sup>. This result suggests that, in comparison to the APTES@g-C<sub>3</sub>N<sub>4</sub>/ITO electrode (0.04 mm<sup>2</sup>), it is more appropriate, with more reaction sites per unit volume, due to the immobilization of biomolecules (i.e., BSA and antibody).

**(iii) Electroactive ionic species ( $\gamma^*$ ): -**

Furthermore, the Brown-Anson equation, which is given as follows, was used to calculate the surface concentration of the absorbed electroactive ionic species (denoted as  $\gamma^*$  in mol cm<sup>2</sup>) for the corresponding electrodes:

$$I_p = \frac{n^2 F^2 \gamma^* A \nu}{4 R T} \dots\dots\dots$$

(S3) Eq.

Here, the peak current is denoted by  $I_p$  ( $I_{pa}$  or  $I_{pc}$ ), the electrode surface area is represented by  $A$ , the surface concentration of the absorbed electro-active species is represented by  $\gamma$ , the scan rate is denoted by  $\nu$  (Vs<sup>-1</sup>), the ambient temperature (298 K) is represented by  $T$ , the Faraday constant (96485 C mol<sup>-1</sup>), and the gas constant (8.314 mol<sup>-1</sup> K<sup>-1</sup>) is represented by  $R$ . The surface concentration ( $\gamma^*$ ) of the BSA/anti-IL8/APTES@g-C<sub>3</sub>N<sub>4</sub>/ITO bioelectrode is approximately 4.0×10<sup>-8</sup> mol cm<sup>2</sup>, which is greater than that of the APTES@g-C<sub>3</sub>N<sub>4</sub>/ITO electrode (1.3×10<sup>-8</sup> mol cm<sup>2</sup>). This discrepancy suggests that the presence of biomolecules and BSA at the former's surface has improved its electrocatalytic performance, making it appropriate for biosensing applications.

**(iv) Heterogeneous electron transfer rate constant (K<sub>s</sub>): -**

The reversibility of electron transfer kinetics is dependent on the heterogeneous electron transfer rate constant (K<sub>s</sub>) as well as the scan rate. The Laviron Equation (11) shows that the values of K<sub>s</sub> for the APTES@g-C<sub>3</sub>N<sub>4</sub>/ITO electrode and the BSA/anti-IL8/APTES@g-C<sub>3</sub>N<sub>4</sub>/ITO bioelectrode are 0.48 s<sup>-1</sup> and 0.67 s<sup>-1</sup>, respectively. Higher K<sub>s</sub> values for the bioelectrode indicate a quicker electron exchange between the redox species in the electrolyte and the electrode surface.

$$K_s = \frac{mnFv}{RT} \dots\dots\dots \text{Eq. (S4)}$$

where m is the peak-to-peak separation of potentials (V)

**S5: Calculation of number of molecules in IL8 at LOD of 0.04 ng mL<sup>-1</sup>:**

Molecular weight of IL8 = 8 kDa or 8 × 10<sup>3</sup> g mol<sup>-1</sup>

Concentration (strength) of IL8 solution at LOD = 0.04 ng mL<sup>-1</sup> or 4×10<sup>-8</sup> g L<sup>-1</sup>

Thus, molarity of solution = strength/ molecular weight

$$\begin{aligned} &= 4 \times 10^{-8} \text{ g L}^{-1} / 8 \times 10^3 \text{ g mol}^{-1} \\ &= 5 \times 10^{-12} \text{ mol L}^{-1} \end{aligned}$$

Number of molecules of IL8 in this concentration

$$\begin{aligned} &= \text{Molarity} \times \text{Avogadro number} \\ &= 5 \times 10^{-12} \text{ mol L}^{-1} \times 6.022 \times 10^{23} \text{ molecules mol}^{-1} \\ &= 3.0 \times 10^{10} \text{ molecules L}^{-1} \end{aligned}$$

So, number of molecules in 1 L or 10<sup>6</sup> μL of solution = 3.0 × 10<sup>10</sup> molecules

Therefore, Number of molecules in 20 μL of solution

$$\begin{aligned} &= 3.0 \times 10^{10} \text{ molecules} \times 20 \mu\text{L} / 10^6 \mu\text{L} \\ &= 6.0 \times 10^3 \text{ molecules} / 20 \mu\text{L} \end{aligned}$$

Hence, 20 μL of 0.04 ng mL<sup>-1</sup> solution contains ~ 6.0 × 10<sup>3</sup> molecules of IL8

**S6: Regeneration and Shelf-life studies**



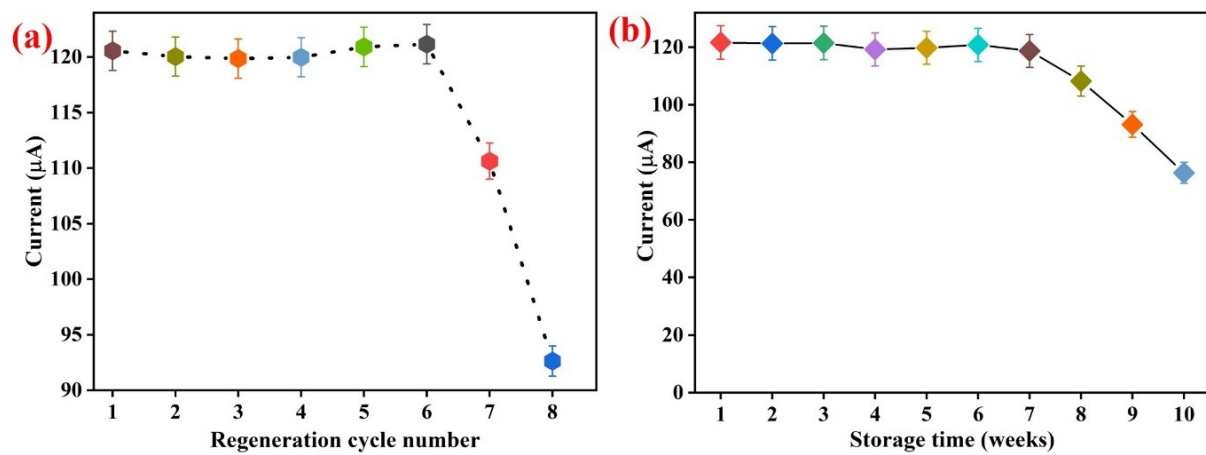

**Figure S3:** (a) The impact of regeneration response on the BSA/anti-IL8/APTES@g-C<sub>3</sub>N<sub>4</sub>/ITO immunoelectrode; (b) Stability analysis of the developed BSA/anti-IL8/APTES@g-C<sub>3</sub>N<sub>4</sub>/ITO immunoelectrode.
